# Supplementary material
Source: PubMed Central journal article supplement (PMC3351296)
Supplement: supp_M111.320770_jbc.M111.320770-1.pdf [file supp_M111.320770_jbc.M111.320770-1.pdf]

**Supplemental Table 1.** List of gene specific primers

| Genes                | Genbank Accession Number | Sequences                                              | size (bp) | Tm (°C) |
|----------------------|--------------------------|--------------------------------------------------------|-----------|---------|
| <i>Dlx3</i> (RT)     | NM_010055                | F: aagccgcgaacgatctact<br>R:cggttctggaaccagat          | 111       | 62      |
| <i>Dlx3</i> CDS      | NM_010055                | F: atgagcggctccttcgatcg<br>R: tactcagtacacagcccag      | 863       | 60      |
| <i>Dlx3</i> probe    | NM_010055                | F: cagcactctgggacacatcttc<br>R: acagtggaacctgcaaacactc | 601       | 62      |
| <i>Dlx3</i> ChIP (1) | NM_010055                | F: tattaagccagggccatacg<br>R: ggtgggcttaggtgagatga     | 267       | 60      |
| <i>Dlx3</i> ChIP (2) | NM_010055                | F: cctggcactaaaacagacc<br>R: ccaacctctcaacctctt        | 200       | 60      |
| <i>Dlx3</i> ChIP (3) | NM_010055                | F: cacattgggggatttatcg<br>R: caagccacagtcaaatgctg      | 285       | 60      |
| <i>Tchh</i>          | NM_001163098             | F: tgatggagcatcacttagcaa<br>R: ggaacaggaggaattcggtg    | 164       | 62      |
| <i>Krt25</i>         | NM_133730                | F: gctctccaccagagcgtaga<br>R: gagcctgcatttcctctttg     | 154       | 62      |
| <i>Krt27</i>         | NM_010666                | F: cagcagcagatttcagacga<br>R: cagttagttgccctcggctc     | 161       | 62      |
| <i>Krt28</i>         | NM_027574                | F: caccatgtctctccggttt<br>R: ctcccaccaggagcactg        | 177       | 62      |
| <i>Krt71</i>         | NM_019956                | F: tcagatccagtcccacatca<br>R: gtacagggcctcagcttcag     | 148       | 62      |
| <i>Hoxc13</i>        | NM_010464                | F: taccagactgggctctttc<br>R: agctgcaccttggtatagg       | 176       | 62      |
| <i>Vdr</i> CDS       | NM_009504                | F: atggaggcaatggcagccag<br>R: tcaggagatctcattgccga     | 1268      | 60      |
| <i>Gapdh</i>         | NM_008084                | F: aactttggcattgtggaagg<br>R: acacattgggggtaggaaca     | 223       | 62      |
