# Supplementary material
Source: PubMed Central journal article supplement (PMC3351296)
Supplement: supp_M111.320770_jbc.M111.320770-2.pdf [file supp_M111.320770_jbc.M111.320770-2.pdf]

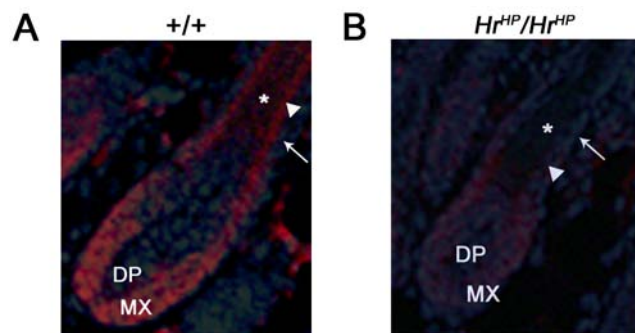

**Supplemental Figure 1. Expression of DLX3 in wild type and *Hr<sup>HP</sup>/Hr<sup>HP</sup>* hair follicle.** Immunohistochemistry revealed that DLX3 (red) is expressed in the hair matrix (MX), inner root sheath (IRS, arrowhead) and hair shaft (HS, asterisk) but not in dermal papilla (DP) and outer root sheath (ORS, arrow) at P7 wild type mice (A). In contrast, DLX3 expression is significantly decreased in hair matrix, IRS and HS at P7 *Hr<sup>HP</sup>/Hr<sup>HP</sup>* mice (B). DAPI staining (blue) indicates nuclei.
